# Supplementary material for: Circuit analysis of the Drosophila brain using connectivity-based neuronal classification reveals organization of key communication pathways
Source: PubMed Central journal article supplement (PMC10275213; doi:10.1162/netn_a_00283), 2023-01-01
Supplement: netn-7-1-269-s005.pdf [file netn-7-1-269-s005.pdf]

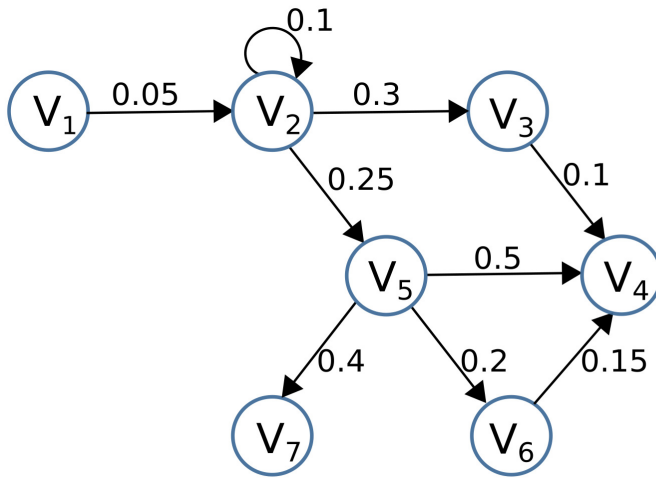

Number of neurons in  $i$ -th class

| $i$ | $ V_i $ | $ \tilde{V}_i $ |
|-----|---------|-----------------|
| 1   | 1000    | 10              |
| 2   | 250     | 2.5             |
| 3   | 100     | 1               |
| 4   | 500     | 5               |
| 5   | 300     | 3               |
| 6   | 400     | 4               |
| 7   | 150     | 1.5             |

Block connection prob.  $p_{ij}$

|   |      |     |      |      |     |     |   |
|---|------|-----|------|------|-----|-----|---|
| 0 | 0.05 | 0   | 0    | 0    | 0   | 0   | 0 |
| 0 | 0.1  | 0.3 | 0    | 0.25 | 0   | 0   | 0 |
| 0 | 0    | 0   | 0.1  | 0    | 0   | 0   | 0 |
| 0 | 0    | 0   | 0    | 0    | 0   | 0   | 0 |
| 0 | 0    | 0   | 0.5  | 0    | 0.2 | 0.4 | 0 |
| 0 | 0    | 0   | 0.15 | 0    | 0   | 0   | 0 |
| 0 | 0    | 0   | 0    | 0    | 0   | 0   | 0 |

Cost  $c_{ij} := \frac{1}{p_{ij}|\tilde{V}_i||\tilde{V}_j|}$

|   |     |      |      |      |      |      |   |
|---|-----|------|------|------|------|------|---|
| 0 | 0.8 | 0    | 0    | 0    | 0    | 0    | 0 |
| 0 | 0   | 1.33 | 0    | 0.53 | 0    | 0    | 0 |
| 0 | 0   | 0    | 2    | 0    | 0    | 0    | 0 |
| 0 | 0   | 0    | 0    | 0    | 0    | 0    | 0 |
| 0 | 0   | 0    | 0.13 | 0    | 0.42 | 0.56 | 0 |
| 0 | 0   | 0    | 0.33 | 0    | 0    | 0    | 0 |
| 0 | 0   | 0    | 0    | 0    | 0    | 0    | 0 |

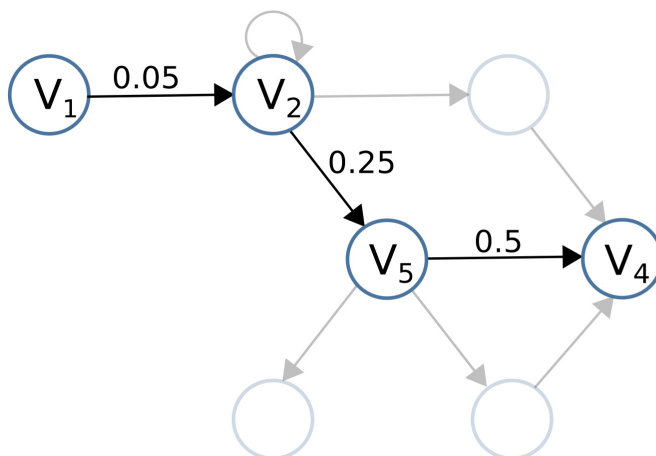

Path:

$$\mathcal{P} = \{V_1, V_2, V_5, V_4\}$$

Path length:

$$\ell(\mathcal{P}) = c_{12} + c_{25} + c_{54}$$

$$= 0.8 + 0.53 + 0.42$$

$$= 1.75$$

**Figure S1:** A simple example illustrating how the path length of a random walk is calculated, using a mock circuit with seven classes (blocks). The number of neurons in each class  $|V_i|$ , and directional edge weights between classes  $p_{ij}$  are assumed to be known — which are used to calculate the cost  $c_{ij}$  of each random step in the walk. The path length for the random walk  $V_1 \rightarrow V_2 \rightarrow V_5 \rightarrow V_4$  is then obtained by summing the costs along the traversed path.
