# Supplementary material for: Circuit analysis of the Drosophila brain using connectivity-based neuronal classification reveals organization of key communication pathways
Source: PubMed Central journal article supplement (PMC10275213; doi:10.1162/netn_a_00283), 2023-01-01
Supplement: netn-7-1-269-s006.pdf [file netn-7-1-269-s006.pdf]

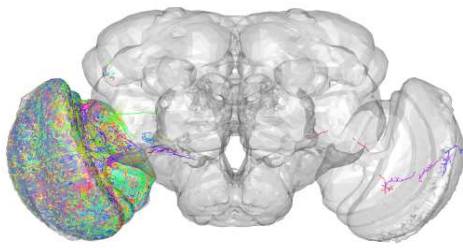

1

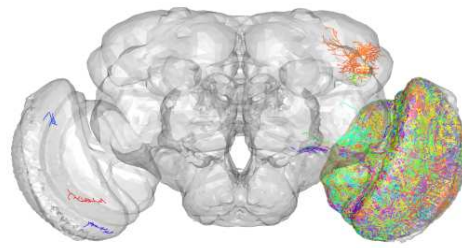

2

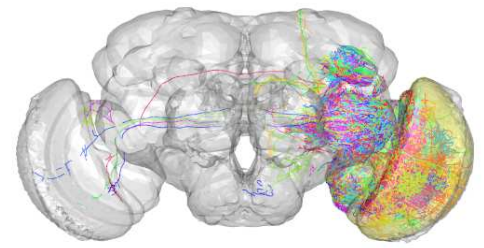

3

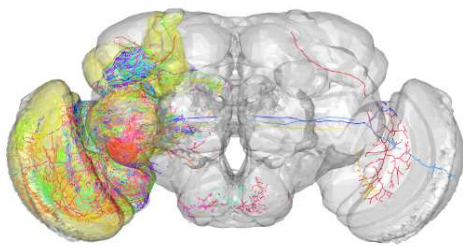

4

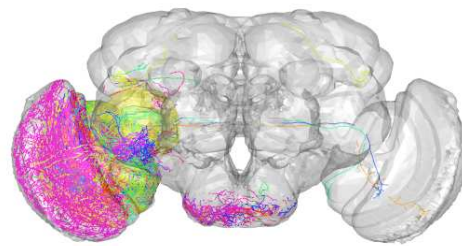

5

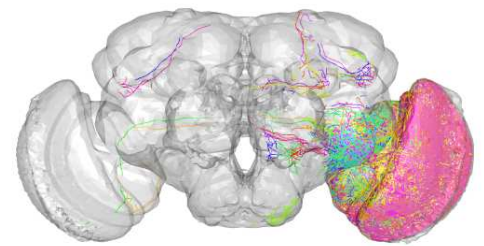

6

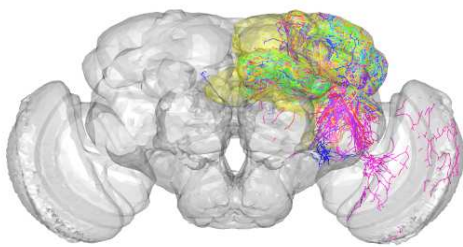

7

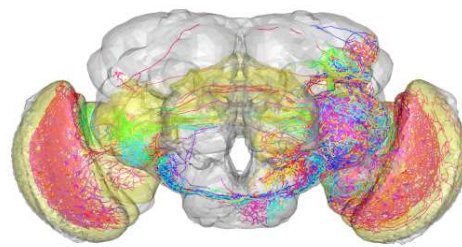

8

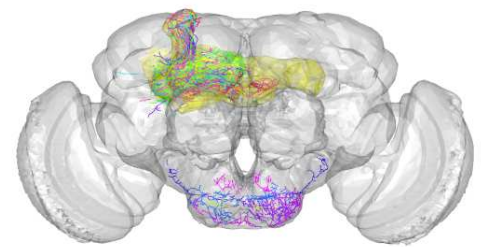

9

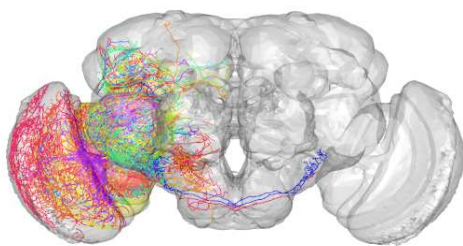

10

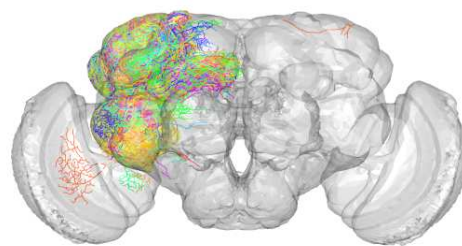

11

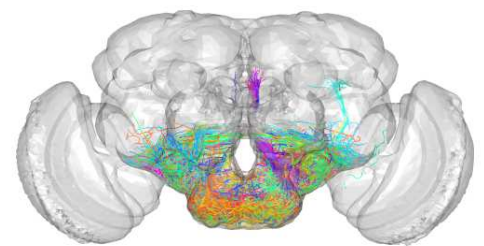

12

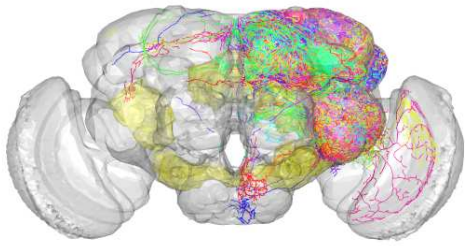

13

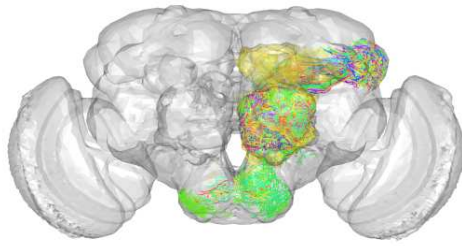

14

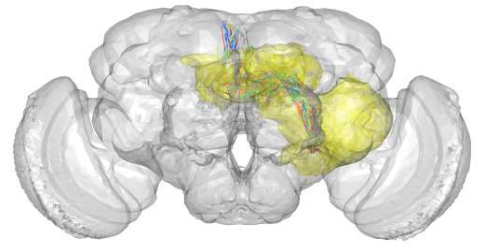

15

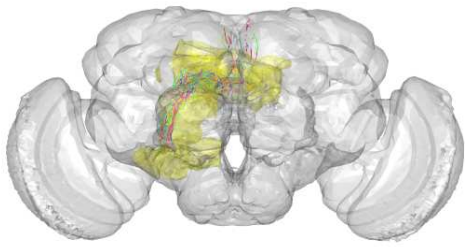

16

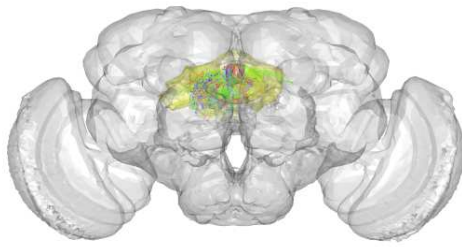

17

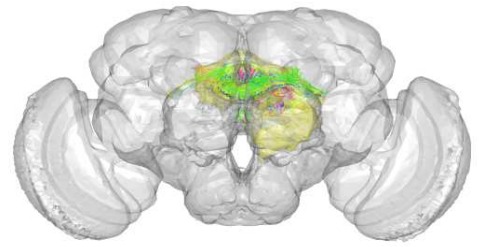

18

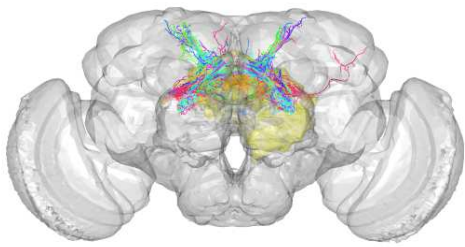

19

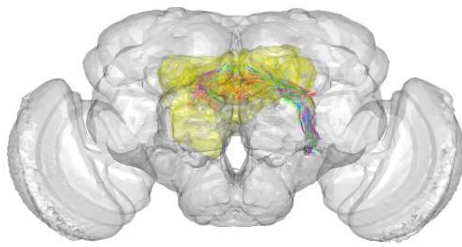

20

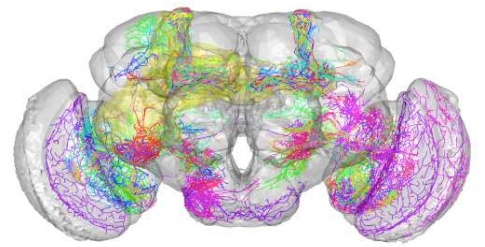

21

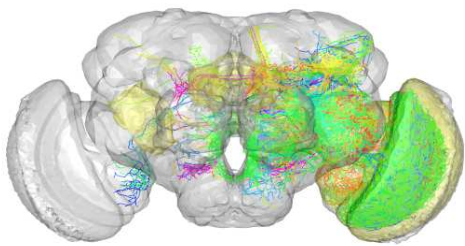

22

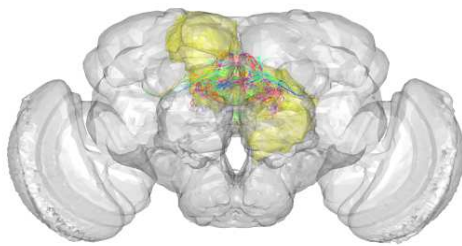

23

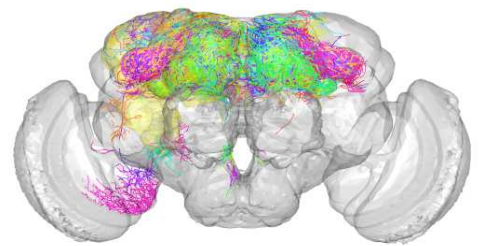

24





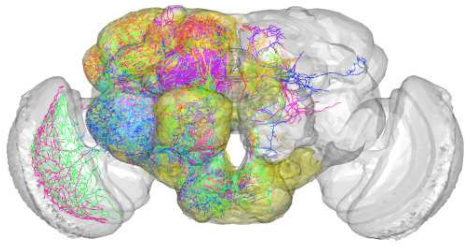

37

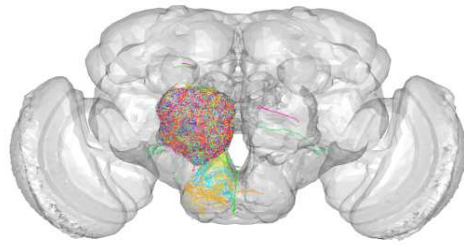

38

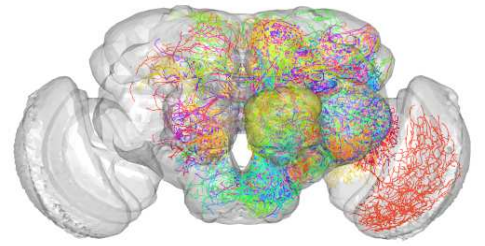

39

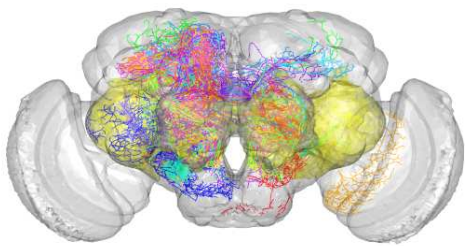

40

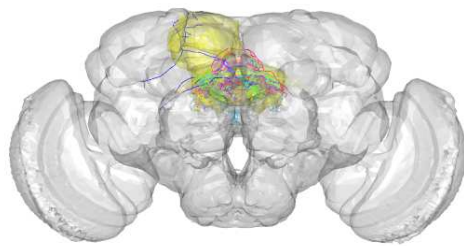

41

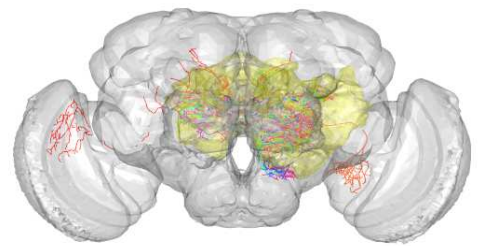

42

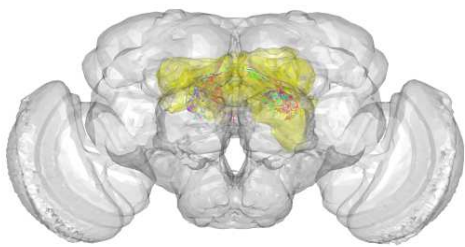

43

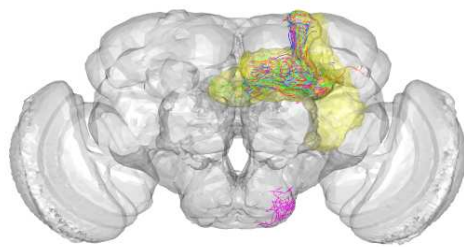

44

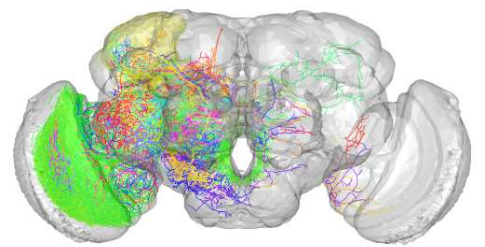

45

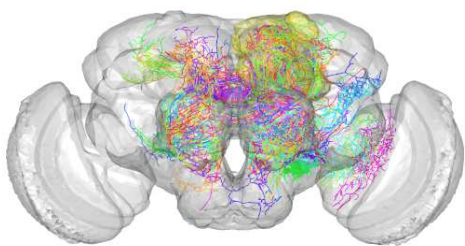

46

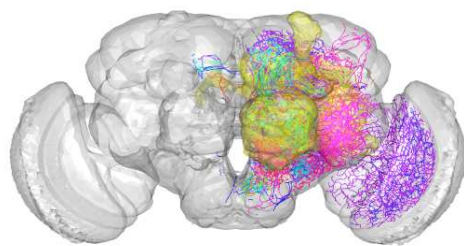

47

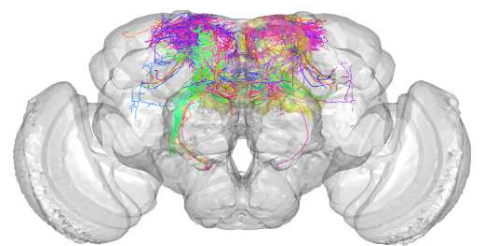

48



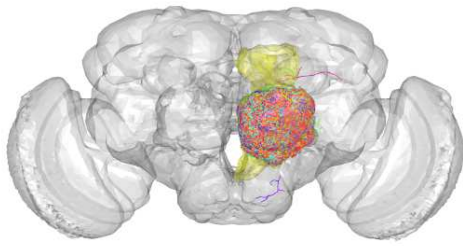

49

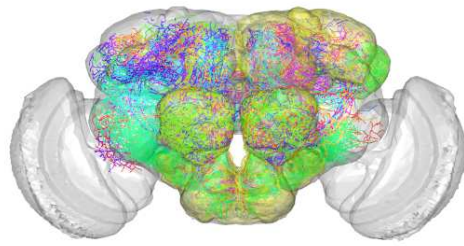

50

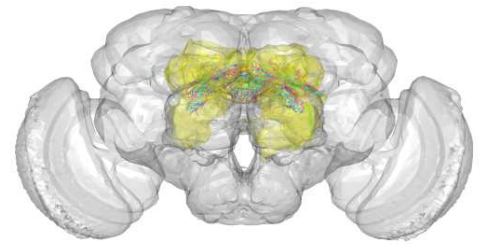

51

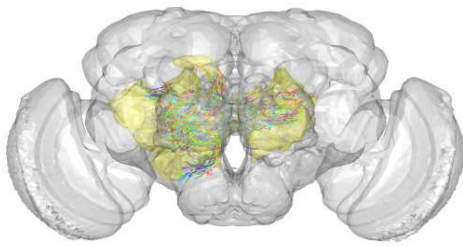

52

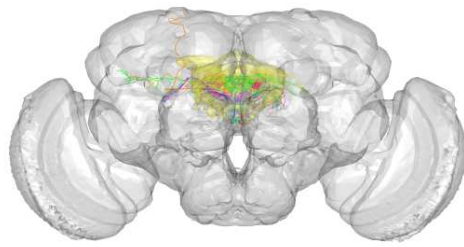

53

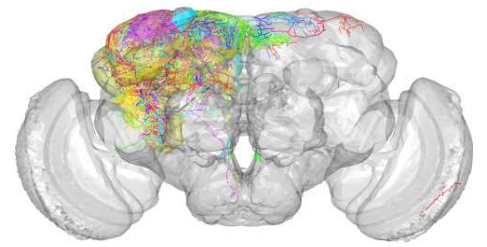

54

**Figure S2:** Each connectivity-based class embedded using the `natverse` 3D template of the *Drosophila* brain, showing its constituent neurons and innervating neuropils.
