# Supplementary material for: Circuit analysis of the Drosophila brain using connectivity-based neuronal classification reveals organization of key communication pathways
Source: PubMed Central journal article supplement (PMC10275213; doi:10.1162/netn_a_00283), 2023-01-01
Supplement: netn-7-1-269-s007.pdf [file netn-7-1-269-s007.pdf]

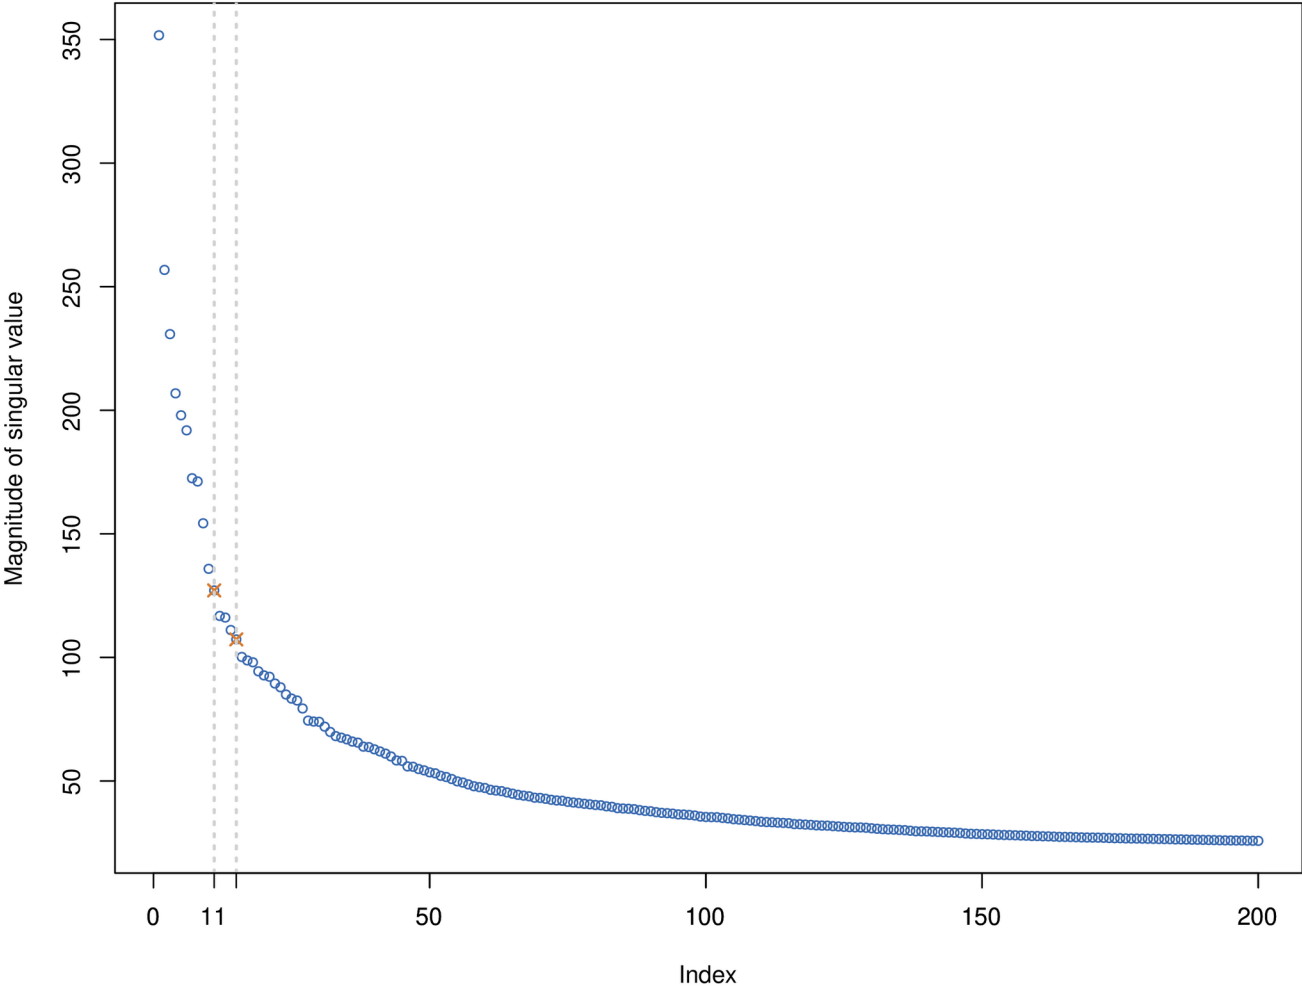

**Figure S3:** The possible choices for the embedding dimensionality  $d=\{11,15\}$  were determined by identifying the first and second elbow-point (Zhu and Ghodsi, 2006), respectively, on the scree plot of singular values.
