# Supplementary material for: Circuit analysis of the Drosophila brain using connectivity-based neuronal classification reveals organization of key communication pathways
Source: PubMed Central journal article supplement (PMC10275213; doi:10.1162/netn_a_00283), 2023-01-01
Supplement: netn-7-1-269-s008.pdf [file netn-7-1-269-s008.pdf]

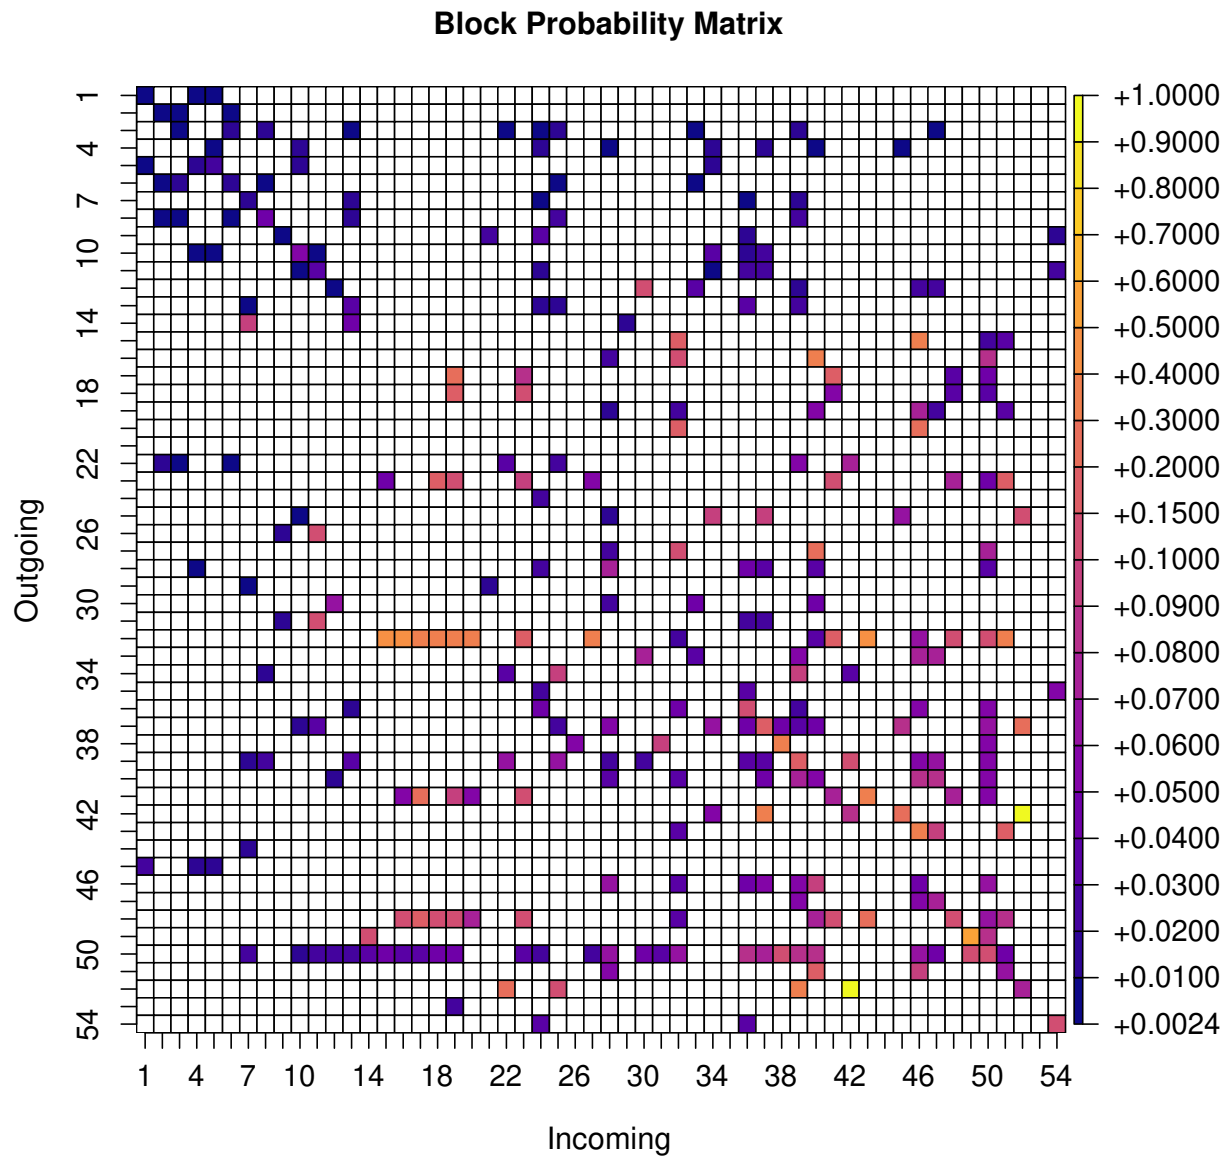

**Figure S4:** (a) The estimated block connectivity probabilities  $\hat{p}_{ij}$ 's between the 54 connectivity-based classes. The 319 non-zero  $\hat{p}_{ij}$ 's represent a weighted, directed edge between the 54 classes in the inferred mesoscale circuit.

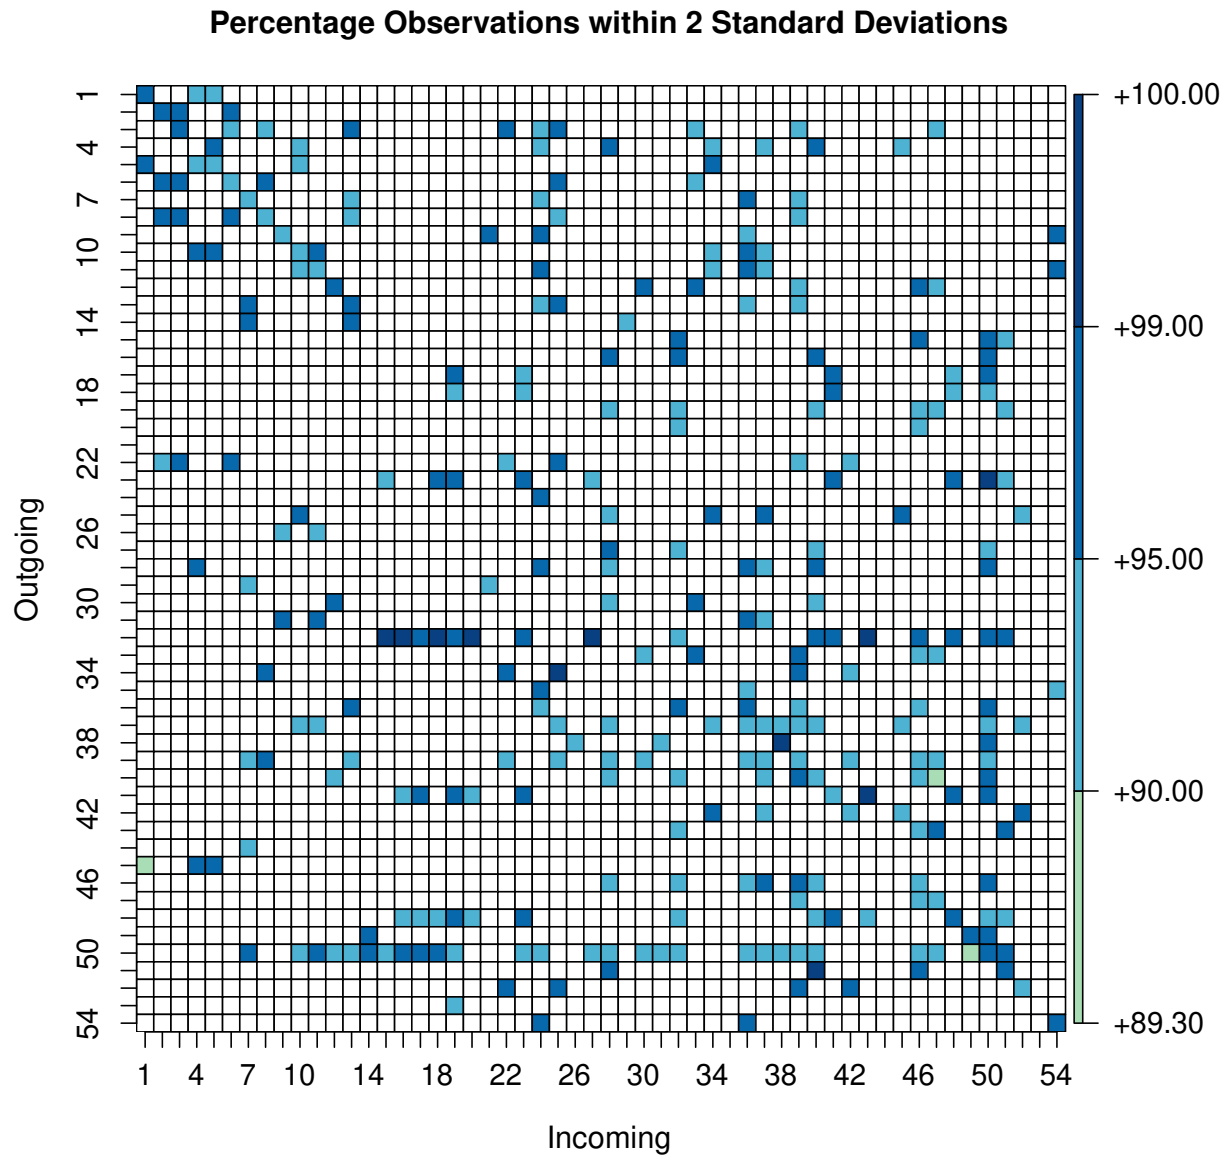

**Figure S4:** (b) The percentage of observed values for a block-pair that lie within two standard deviations of the expected binomial mean  $|V_j|\hat{p}_{ij}$ .

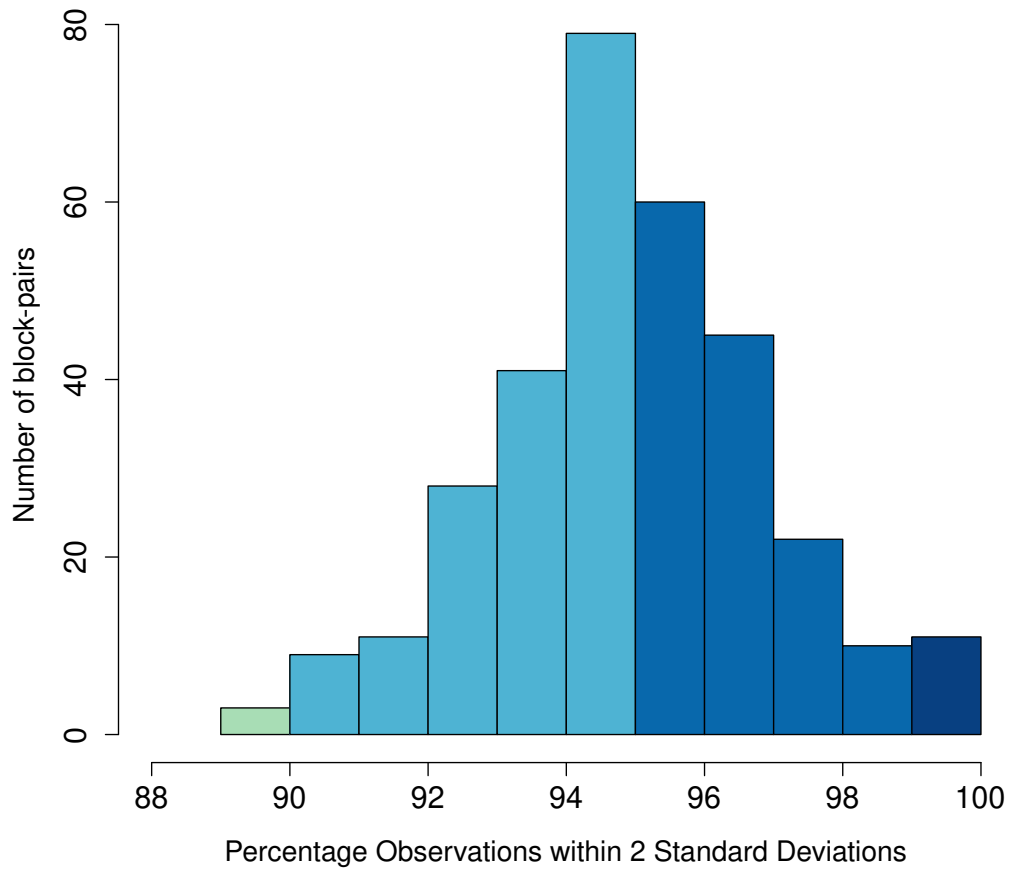

**Figure S4: (c)** A histogram showing the frequency count of block-pairs by the percentage of observed values that lie within two standard deviations of the expected binomial mean  $|V_j|\hat{p}_{ij}$ .
